# Supplementary material for: Towards a typology of university technology transfer organizations in China: evidences from Tsinghua University
Source: Springer Nature journal article supplement (doi:10.1186/s40604-018-0061-9), 2018-12-01
Supplement: MOESM1 [file 16358762]

## Multilingual abstracts

### Arabic

Han Zhang, Yuzhuo Cai, Zhengfeng Li

نحو تصنيف نقل التكنولوجيا من المؤسسات الجامعية في الصين: حقائق من جامعة تسينغها

تعتبر هذه الورقة أن القصور في الفهم الشامل للأشكال التنظيمية في مجال نقل التكنولوجيا الموجودة في يمنع تطور الممارسة والأبحاث حول نقل التكنولوجيا بين الجامعة (UITT) الجامعات والصناعة في الصين والصناعة في هذا البلد. في هذا السياق تأتي هذه المحاولة لتصنيف مختلفة أنواع تنظيم نقل تكنولوجيا ينبغي أن يلبي تطور هذه المؤسسات الطلب على الابتكار في الصين في مراحله. (UTTOS) (الجامعات نظرا لان نقل UTTOS) (المتعددة. نعتد على جامعة تسينغها كمثال لنفترح نظرة شاملة لفهم أنماط التكنولوجيا لجامعة تسينغها يمكن اعتباره نموذجا مصغرا في هذا المجال في الصين والذي يتميز بممارسات وتجربة ناجحة يمكن اعتمادها في الجامعات الصينية. لذلك قمنا بدمج UITT رائدة فيما يتعلق بتنظيم للتمييز UTTOS المساهمات العلمية العالمية لبناء إطار تحليلي يركز على ستة أبعاد للخصائص التنظيمية في جامعة تسينغها ووصف مفصل (UTTOS) بين النماذج. بالإضافة إلى تحديد ثمانية أنواع من لخصائصها التنظيمية يساهم هذا المقال كذلك في إدماج المعرفة من خلال تحسين أدوات التحليل والتصنيف نتوجه إلى المتدخلين الصينيين والدوليين ذات المصلحة التي يمكن أن UTTOS ودراسة الخصائص التنظيمية ببعض المقترحات بالاستناد إلى (RD) تتعاون مع الجامعات الصينية في نقل التكنولوجيا عبر البحث والتطوير. نتائج بحثنا

الكلمات المفتاح: نقل التكنولوجيا, الابتكار, التفاعل بين الجامعة والصناعة, جامعة تسينغها, الصين
